# Supplementary material
Source: PubMed Central journal article supplement (PMC6376276)

Figure 1A

Beclin1

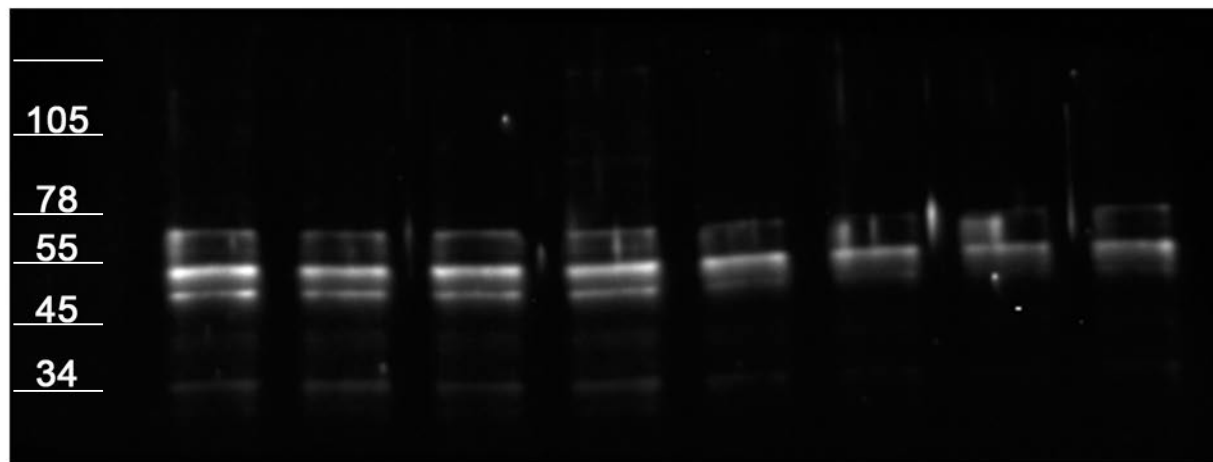

Actin

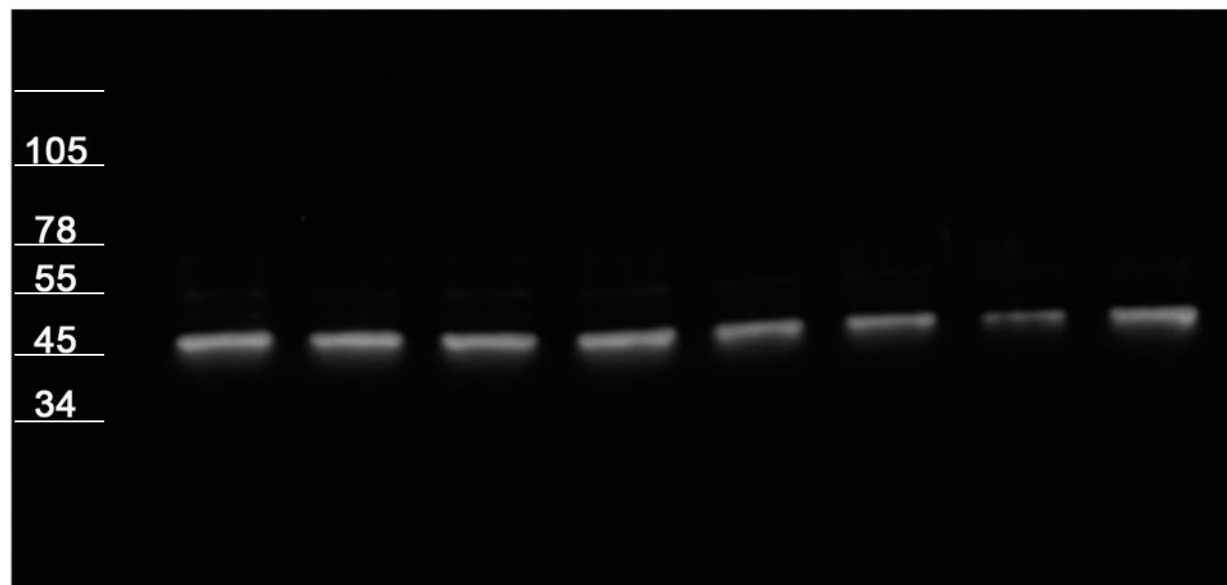

Figure 1B

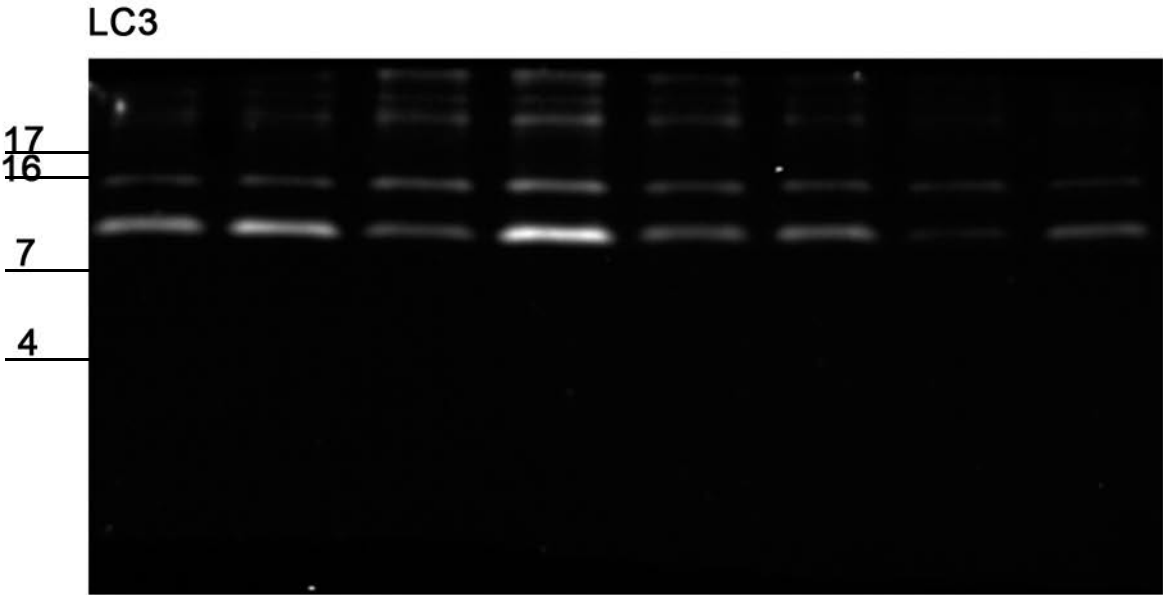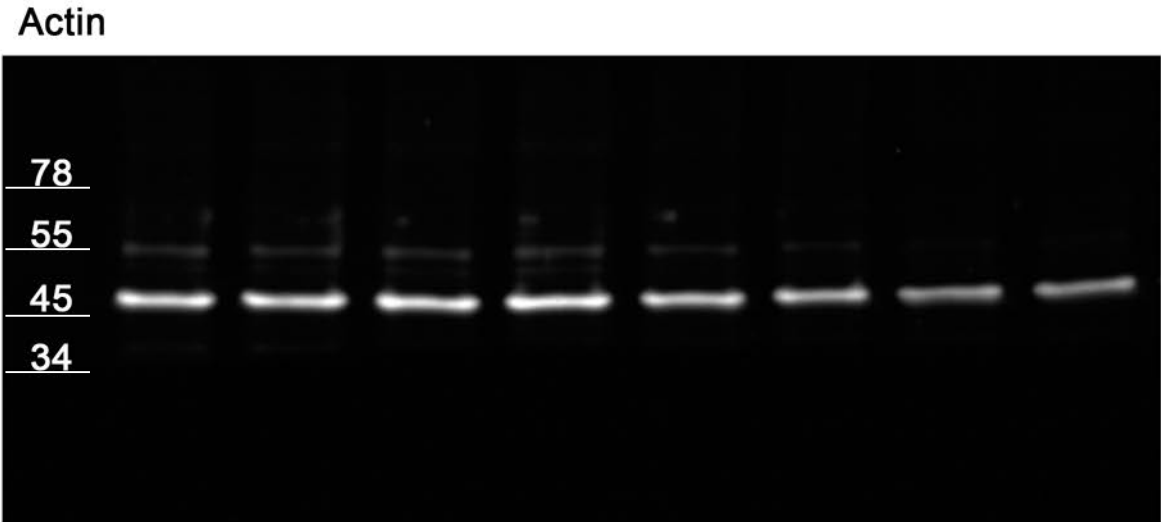

Supplement: EMBJ-38-e99430-s005.pdf [file EMBJ-38-e99430-s005.pdf]

Figure 3A

NLRP3

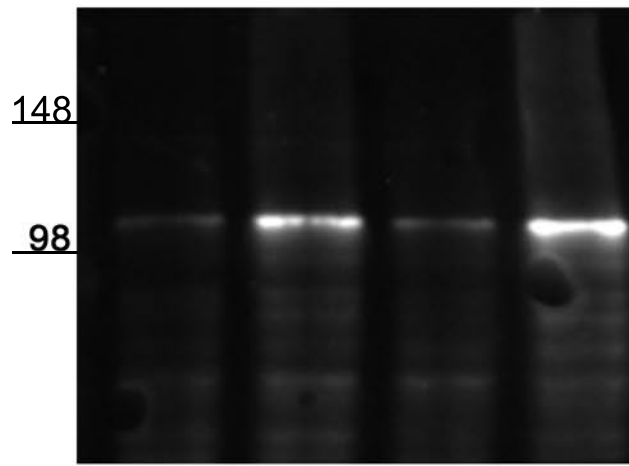

Actin

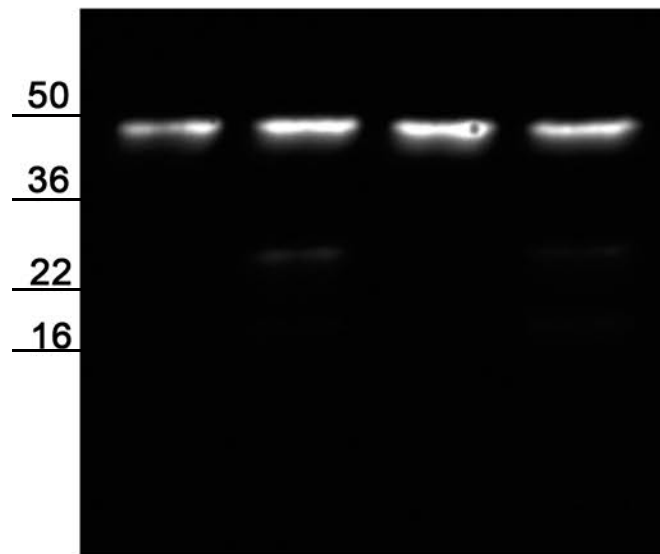

Figure 3D

Caspase1

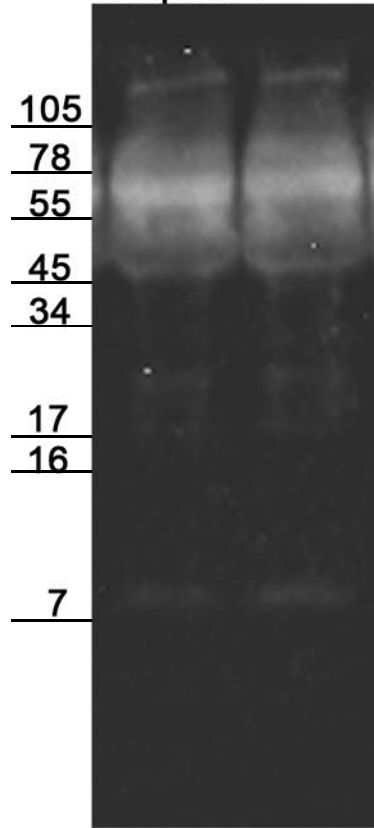

Actin

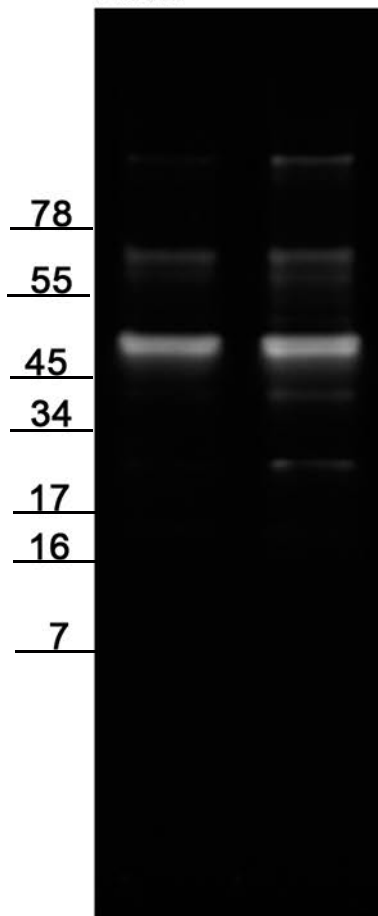

Supplement: EMBJ-38-e99430-s006.pdf [file EMBJ-38-e99430-s006.pdf]

Figure 5E

CALCOCO2

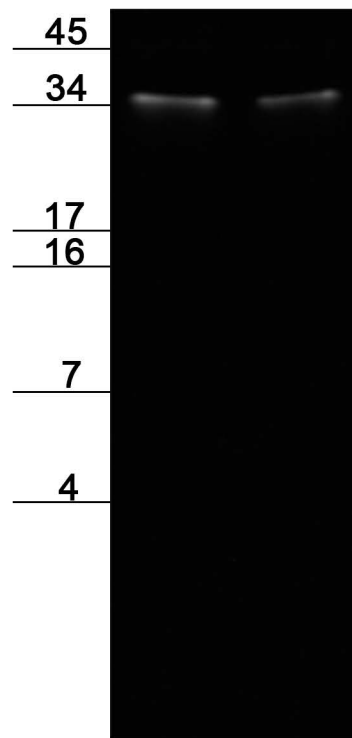

Actin

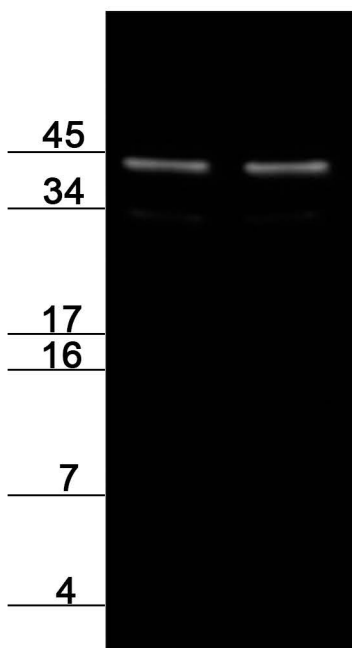

Supplement: EMBJ-38-e99430-s007.pdf [file EMBJ-38-e99430-s007.pdf]
